# Supplementary material for: Functional and Safety Outcomes of Carotid Artery Stenting and Mechanical Thrombectomy for Large Vessel Occlusion Ischemic Stroke With Tandem Lesions
Source: PubMed Central journal article supplement (PMC9978940; doi:10.1001/jamanetworkopen.2023.0736), 2023-03-01
Supplement: jamanetwopen-e230736-s002.pdf [file jamanetwopen-e230736-s002.pdf]

## Data Sharing Statement

Farooqui. Functional and Safety Outcomes of Carotid Artery Stenting and Mechanical Thrombectomy for Large Vessel Occlusion Ischemic Stroke With Tandem Lesions. *JAMA Netw Open*. Published March 01, 2023. doi:10.1001/jamanetworkopen.2023.0736

### Data

**Data available:** Yes

**Data types:** Deidentified participant data

**How to access data:** Data will be made available from the corresponding author upon reasonable request

**When available:** With publication

### Supporting Documents

**Document types:** None

### Additional Information

**Who can access the data:** Data will be made available for the researchers upon reasonable request

**Types of analyses:** For a specified purpose

**Mechanisms of data availability:** Data will be made available after signed agreement
